# Supplementary material
Source: PubMed Central journal article supplement (PMC6078462)

A

RBPj-binding site

*Mus musculus* ...TCTCAGAGGCAGAT--CCAAATC---CTACT-TCT**AGG**TGT**GGGAAA**AGGTGTAGAGAATCATTGAGGTGGGTGGAGCGTCA -1474  
*Bos taurus* ...TCTC-CAAGTAGCTTTCTAGTC-----AGGGGC**AGGC**AGA**GGAA**-CAGTCCC----AATAGTAGACGTGGGTGGAGCCCG -1536  
*Pongo abelii* ...GTT--GAGGCGGAC--CGGGACAGACAACGGTCT**AGGCCAGGGAAA**TGGTCCC---GAATGGTTGACGTGGGTGGAGCGCCA -1448  
*Homo sapiens* ...GTT--GAGGCGGAC--CCGGACAGGCAACGGTCT**AGGCCAGGGAAA**TGGTCCC---GAATGGTTGCGTGGGTGGAGCGCCA -1533

T-box1

*Mus musculus* ...TCATT**CCATATG**GCCAGGGGCGGCC**CCACACCC**GGGTGCA**AACT**GCCTCAGGCCCCGAGCCTC**CGTGCAGGTG**AGAAAAAC -1347  
*Bos taurus* ...TCGCC**CCATATG**GCCAGGGGCGGCC**CCACACCC**GGGTGCGAACTGCCCGGGGCCCGAGCCT**CGCGTGCAGGTG**ACAAAAAC -1410  
*Pongo abelii* ...CCGCC**CCATATG**GCCAGGGGCGGCC**CCACACCC**GAGTGCGAACAGCCGGGGCCCCCAGCCT**CGCGTGCAGGTG**AGAAAAAT -1322  
*Homo sapiens* ...CCGCC**CCATATG**GCCAGGGGCGGCC**CCACACCC**GGGTGCGAACTGCCCGGGGGCCCCCAGCCT**CGCGTGCAGGTG**AGAAAAAT -1407

E-box2

*Mus musculus* ...TGGG**CCACACATCTG**TGCTT**CCATTG**GCTGAAGTAGGGAAAGGTGGGATGTACTGAGGGCCCT**ACCCCAAATGGG**TGCC -1221  
*Bos taurus* ...TGAGG**CCATACATCTG**CGCTCC**CATTG**GCTCAGGTAGCGGGAGGTGGCATGTGCTGGGCTTCTCTGACT**CCAAATGGGAGCG** -1283  
*Pongo abelii* ...TGGGG**CCACACAT**TGCGT**TCCATTG**GCTGAAGGAAGGAGAGGTGGGATGTGCTGGGGCTCTGAT**CCCAAATGGGAGCC** -1195  
*Homo sapiens* ...TGGGG**CCACACAT**TGCGT**TCCATTG**GCTGAAGGACGGAGAGGTGGGATGTGCTGGGGGCCCTGAT**CCCAAATGGGAGCC** -1280

E-box4

B

LacZ mRNA expression in the PSM

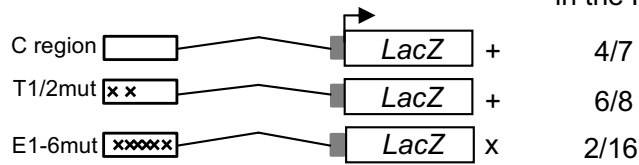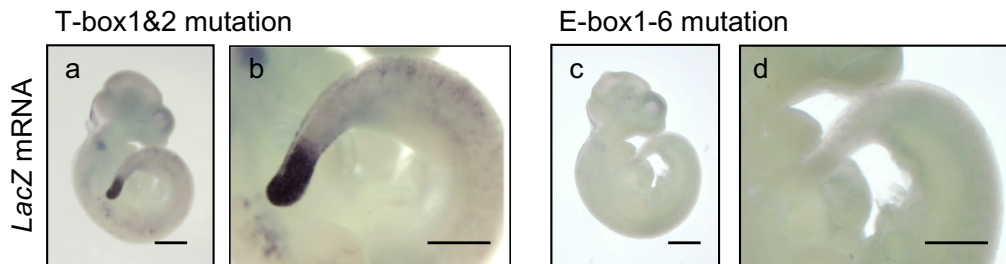

Supplement: supp_RA118.003728_137801_2_supp_150379_p35x83.pdf [file supp_RA118.003728_137801_2_supp_150379_p35x83.pdf]
