# Supplementary material
Source: PubMed Central journal article supplement (PMC6078462)

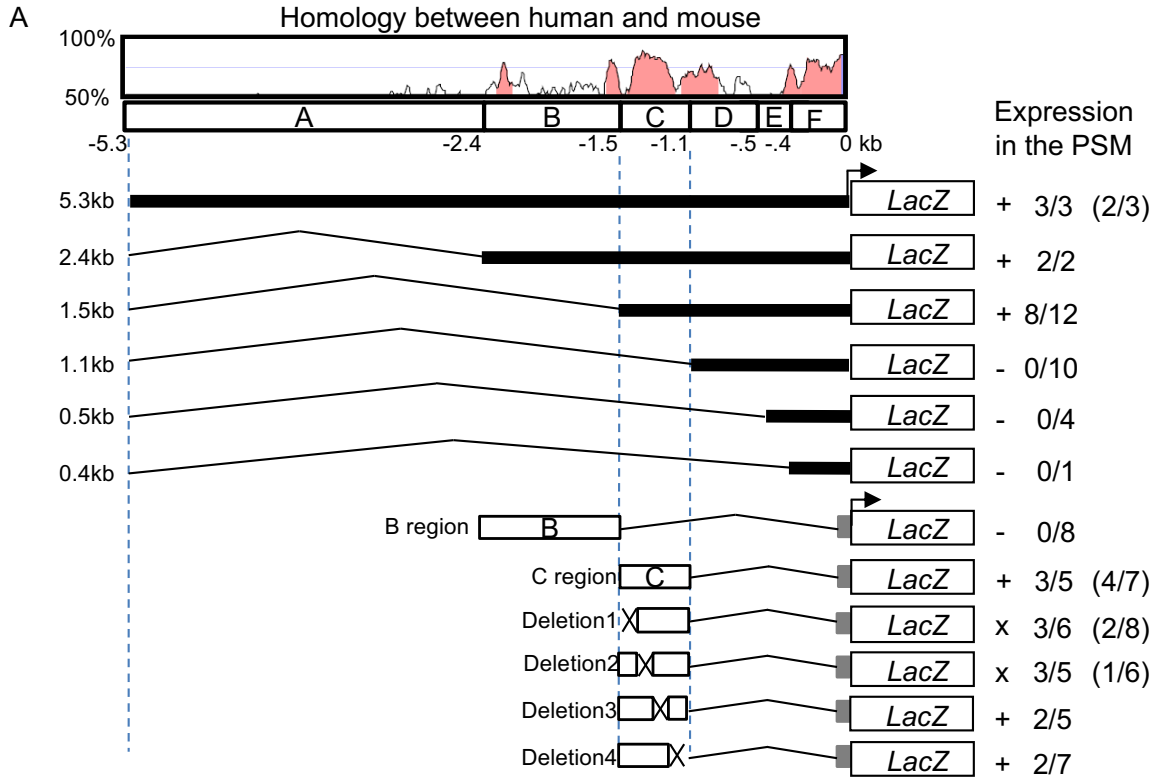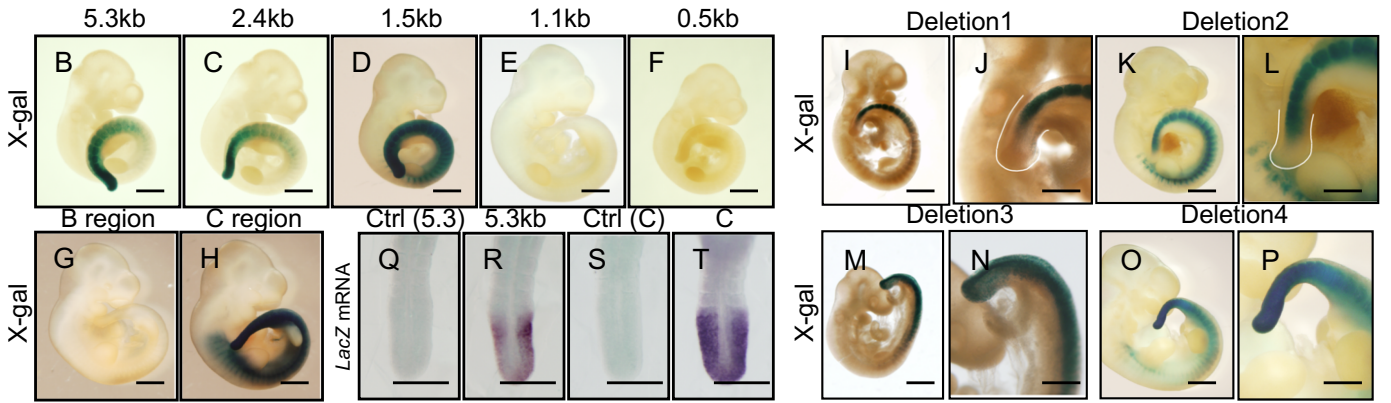

Supplement: supp_RA118.003728_137801_2_supp_150380_p25x82.pdf [file supp_RA118.003728_137801_2_supp_150380_p25x82.pdf]

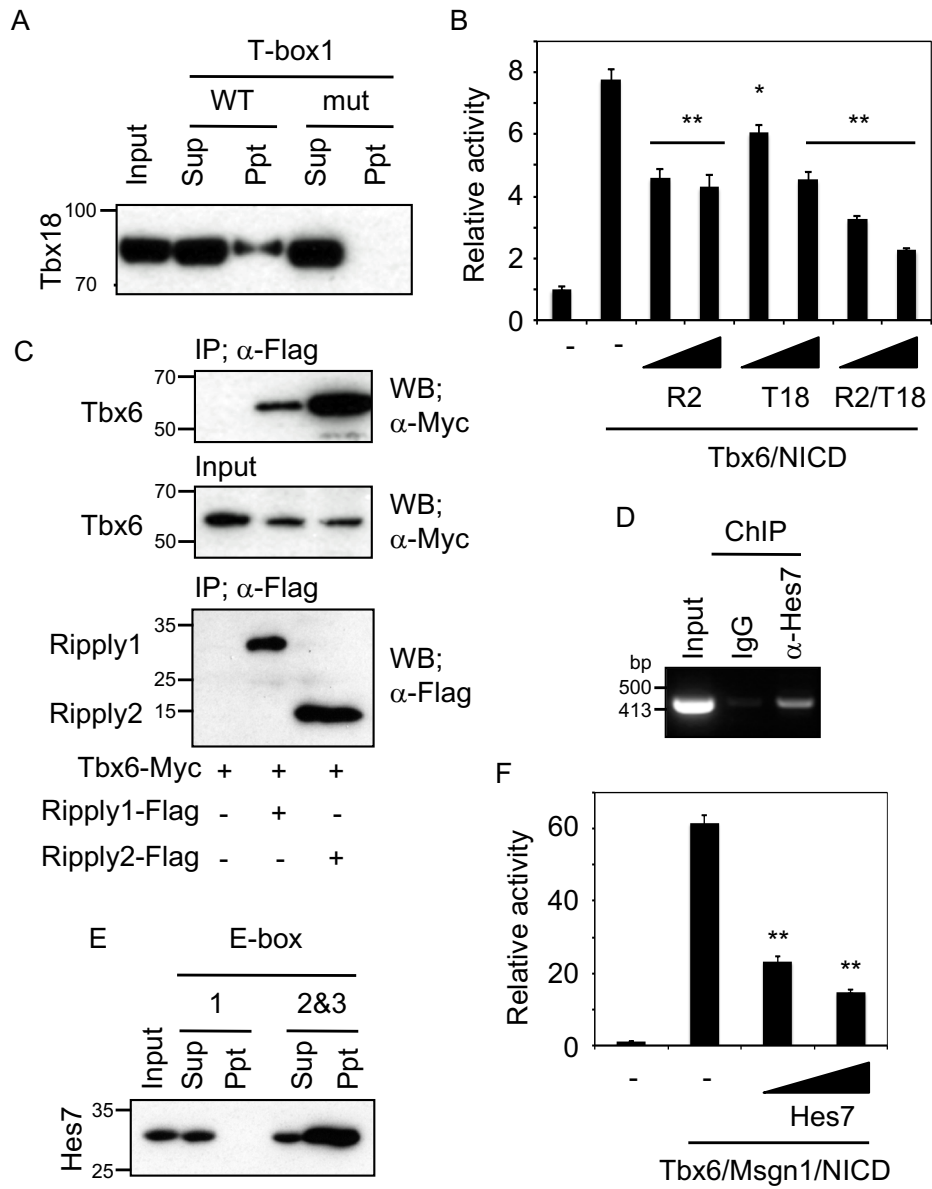

Supplement: supp_RA118.003728_137801_2_supp_150381_p55x85.pdf [file supp_RA118.003728_137801_2_supp_150381_p55x85.pdf]

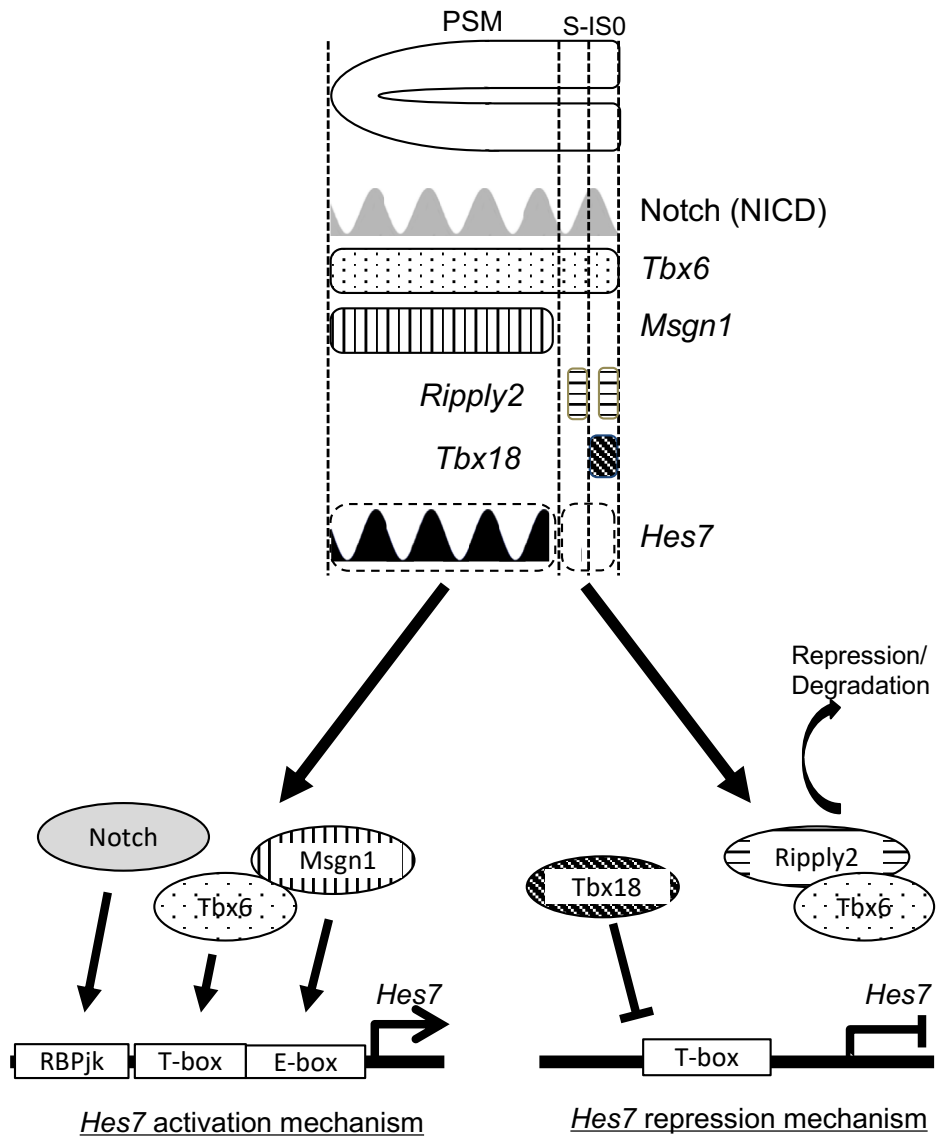

Supplement: supp_RA118.003728_137801_2_supp_150382_p75x87.pdf [file supp_RA118.003728_137801_2_supp_150382_p75x87.pdf]

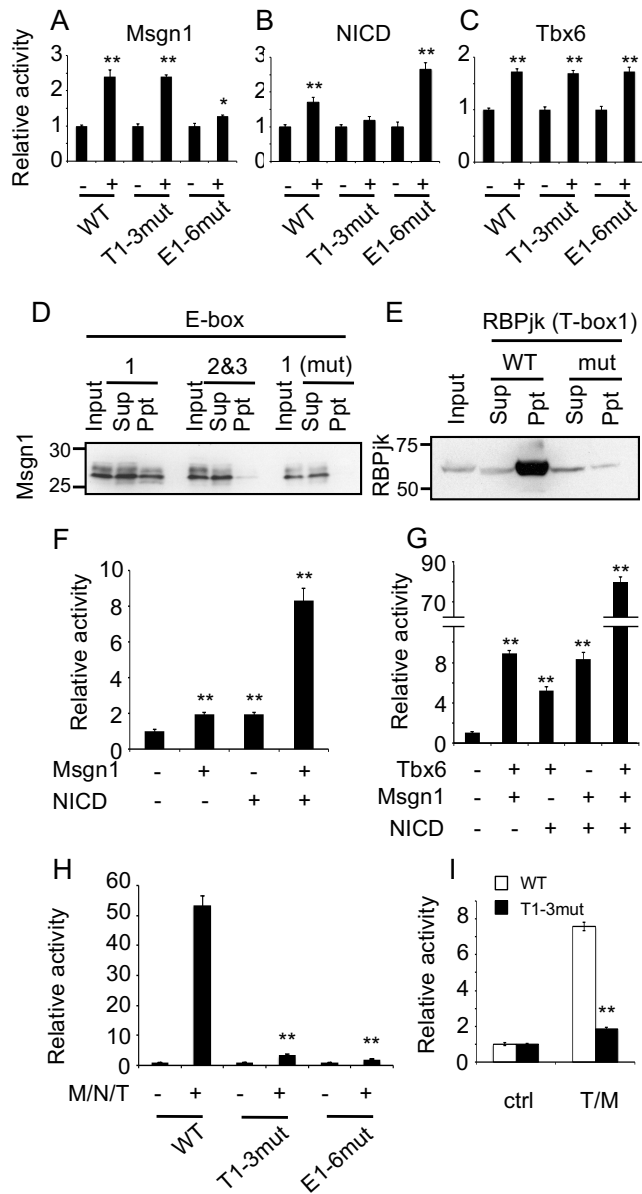

Supplement: supp_RA118.003728_137801_2_supp_150384_p65x8f.pdf [file supp_RA118.003728_137801_2_supp_150384_p65x8f.pdf]
